# Supplementary material for: Hot-spot identification on a broad class of proteins and RNA suggest unifying principles of molecular recognition
Source: PubMed Central journal article supplement (PMC5570288; doi:10.1371/journal.pone.0183327), 2017-08-24
Supplement: pone.0183327.s001.pdf [file pone.0183327.s001.pdf]

# Supporting Information

## Peptide deformylase assays

### Materials

Testing compounds were diluted with 10% DMSO. Actinonin was purchased from Sigma-Aldrich and will be diluted with 10% DMSO. f-Met-Ala-Ser(fMAS) was purchased from GenScript and diluted with deionized water. Fluorescamine was purchased from Sigma and diluted with dry dioxane. DMSO was purchased from Amresco.

### Buffers

Buffer A, 20 mM Tris, pH 8.0, 10 mM NaCl, 5 mM NiCl<sub>2</sub>; Buffer B, 20 mM Tris, pH 8.0, 5 mM NiCl<sub>2</sub>.

### Methods

#### 1. The amplification of plasmid pET-22b-def and restriction enzyme analysis

The plasmid pET-22b-def obtained from Professor Pei was transformed into DH5 $\alpha$ competent cells, which were incubated overnight on LB agar plates supplemented with 100  $\mu$ g/ml ampicillin at 37°C. The overnight culture of DH5 $\alpha$ cells harboring plasmid pET-22b-def was grown at 37°C for 16h with shaking in LB medium containing 100  $\mu$ g/ml ampicillin for plasmid amplication. The plasmids were extracted and confirmed by the assay of the enzyme cleavage using EcoR I and Nde I . It is consistent[1] with a previous report (~

23 500bp).

24

## 25 2. Expression of PDF and determination

26 The plasmid pET-22b-def was transformed into E.coli BL21(DE3). Clones  
27 were selected at 37°C on LB agar plates supplemented with 100 µg/ml  
28 ampicillin. The overnight culture of BL21(DE3) cells was grown at 37°C with  
29 shaking in LB medium containing 100 µg/ml ampicillin. The culture was  
30 transferred to the 1L LB medium containing 100 µg/ml ampicillin at 1%  
31 inoculation(The culture left was added to glycerol and stored at -80°C), and  
32 incubation was continued for 2-3h at 37°C with shaking to get cells  
33 concentration of an OD<sub>600</sub> of 0.6. The culture was added by IPTG to a final  
34 concentration of 200 µM and was induced for 4 h at 30°C. The cells were  
35 harvested by centrifugation and resuspended in buffer A plus protease  
36 inhibitor cocktail. The cells were disrupted by sonication. Cell debris was  
37 removed by centrifugation. The overexpressed PDF in BL21(DE3) cells was  
38 determined by 15% SDS-PAGE. The result is consistent[2] with a previous  
39 report. In above steps, E.coli BL21(DE3) cells and E.coli BL21(DE3) cells  
40 carrying pET-22b were used as control.

41

## 42 3 Purification[3] of Ni-PDF

43 All steps were carried out at 0-4 °C unless otherwise stated. The supernatant  
44 obtained was loaded onto a Q-Sepharose Fast Flow column and was eluted

---

45 with buffer A plus a linear gradient of KCl from 0 to 0.5mol/L. Fractions were  
46 collected and analysed by SDS-PAGE. The fractions containing the majority of  
47 the 20 kDa PDF were pooled. The pooled fractions were concentrated using  
48 Centrifugal Filter Devices, then was loaded onto a Sephacryl S-300(size  
49 exclusion chromatography) column. Proteins were eluted with a linear gradient  
50 of 0 to 0.15mol/L NaCl in buffer B. Fractions were collected and analysed by  
51 SDS-PAGE. The purest fractions were pooled, concentrated in Centrifugal  
52 Filter Devices and stored at -80° C. The enzyme concentration was  
53 determined using Protein Assay Kit with Bovine Serum Albumin as standard.

54

#### 55 4 PDF in vitro Assay[4]

56 The assay was performed in a single 96 well plate in a final volume of 100 µl  
57 containing:

- 58 • 20 µl 0.4 µg/ml PDF
- 59 • 20 µl 400 mM Hepes pH 7.0+3.5M KCl+0.175% Brij+5mM NiCl<sub>2</sub>
- 60 • 10 µl serial dilution of test compound in 10% DMSO
- 61 • 50 µl 8mM formyl-Met-Ala-Ser

62 The assay was incubated at 37° C for 0, 0.5, 1, 2, 4, 8, 24 h, respectively.

63 The free amino group of the deformedylated (Met-Ala-Ser) product was detected  
64 using fluorescamine, by the following additions:

- 65 • 50 µl 0.2M borate pH 9.5
- 66 • 50 µl fluorescamine (200 µg/ml in dry dioxane)

67 Fluorescence was quantified on Thermo Fluoroskan Ascent FL using an  
68 excitation wavelength of 390 nM and an emission wavelength of 485 nM.  
69 Standard control reactions are a no inhibitor reaction which provides the zero  
70 inhibition figure and a no enzyme and no inhibitor reaction which provides the  
71 100% inhibition figure. The data was analysed by conversion of the  
72 fluorescence units to % inhibition and the inhibitor concentration plotted  
73 against % inhibition. The data was fitted to a sigmoidal function:  
74  $y=A+((B-A)/(1+((C/x)^D)))$ , wherein A represents zero inhibition, B represents  
75 100% inhibition and C represents the IC<sub>50</sub>, D represents the slope. The IC<sub>50</sub>  
76 represents the concentration of inhibitor required to decrease enzyme activity  
77 by 50%.

78

## 79 **NMR and MS Characterization for PDF Inhibitors**

80 Indole derivatives were synthesized as previously described.<sup>5</sup>

81

### 82 **N-hydroxy-2-(1H-indol-2-yl)acetamide (2)**

83 <sup>1</sup>H NMR (300 MHz, CH<sub>3</sub>OD) δ 10.91 (br s, 1H), 10.62 (br s, 1H), 8.87 (br s, 1H),  
84 7.38 (d, 1H, *J* = 6.0 Hz), 7.28 (d, 1H, *J* = 6.0 Hz), 6.97 (t, 1H, *J* = 6.0 Hz), 6.89  
85 (t, 1H, *J* = 6.0Hz), 6.16 (s, 1H), 3.42(s, 2H). LCMS 191.3 [M]<sup>+</sup>.

86

### 87 **N-hydroxy-2-(1-methyl-1H-indol-3-yl)acetamide (3)**

88 <sup>1</sup>H NMR (300 MHz, CH<sub>3</sub>OD) δ 10.57 (br s, 1H), 8.72 (br s, 1H), 7.54 (d, 1H, *J* =

---

89 6.0 Hz), 7.34 (d, 1H,  $J = 6.0$  Hz), 7.13 (s, 1H), 7.12 (t, 1H,  $J = 6.0$  Hz), 6.98 (t,  
90 1H,  $J = 6.0$  Hz), 3.33 (m, 3H) 2.47 (s, 2H). LCMS 204.1 [M]<sup>+</sup>.

91

92

### 93 **N-hydroxy-2-(1-isopropyl-1H-indol-3-yl)acetamide (4)**

94 <sup>1</sup>H NMR (300 MHz, CH<sub>3</sub>OD)  $\delta$  10.57 (s, 1H), 8.74 (br s, 1H), 7.53 (d, 1H,  $J =$   
95 6.0 Hz), 7.41 (d, 1H,  $J = 6.0$  Hz), 7.27 (s, 1H), 7.07 (t, 1H,  $J = 5.7$  Hz), 6.98 (t,  
96 1H,  $J = 5.7$  Hz), 4.65 (dt,  $J = 5.1$  Hz), 2.47 (s, 2H), 1.39 (d, 6H,  $J = 5.1$  Hz).

97 LCMS 232.2 [M]<sup>+</sup>.

98

## 99 **Simulation Details**

100 All simulations place the protein in a rectangular box large enough to  
101 accommodate three layers of solvent and are done with periodic boundary  
102 conditions. These two operations minimize artifacts that can arise from edge  
103 effects.

104

105 The grand canonical Monte Carlo (GCMC) algorithm used in this study was  
106 developed by Adams[5] in 1975. In the previous studies done by Guarnieri and  
107 co-workers, Mezei's cavity-bias[6] technique with detailed balance corrections  
108 to improve the efficiency of the Adam's algorithm was used. In this study,  
109 however, we do not use cavity-bias, instead it has been replaced with a simple  
110 biased learning algorithm that is much easier to implement and maintain during

111 the simulation. To our knowledge, since there is no description in the  
112 literature of the technical difficulties in performing cavity-biased GCMC, we will  
113 describe these difficulties here, which will clearly show the motivation for  
114 developing a new method.

115

116 The cavity-bias method requires creating a 3-dimensional grid inside the  
117 protein simulation cell. An algorithm systematically scans every grid point to  
118 discover the vertices that are occupied by a protein atom and the vertices that  
119 are not. Fragment insertion is attempted only where there are free grid points.  
120 The cavities are continuously monitored during the simulation, because when  
121 a fragment insertion is accepted, the previously free grid is now occupied and  
122 no further insertion attempts occur at this site unless a successful deletion  
123 from this site happens. There are 2 major practical problems with cavity-bias,  
124 1) the appropriate spacing of the grids is not obvious and 2) where the grids  
125 are started is arbitrary. If the grid spacing is made very small, <1Å for  
126 example, then there is a very large number of grids to keep track of during the  
127 simulation and many of them are superfluous. If the grid spacing is made  
128 larger, there is a chance of missing an important cavity. When it was  
129 recognized that important cavities could be missed in this process, an  
130 algorithm that periodically shifts the grids by a fraction of an Angstrom was  
131 employed, because repositioning the grids often uncovers an additional cavity.  
132 These procedures result in several difficulties, 1) how often should the grids be

---

133 shifted, 2) once the grids are shifted how many new and additional trial  
134 configurations need to be generated to sample potentially newly uncovered  
135 cavities, 3) many of the grids are superfluous arising from an overly dense grid  
136 due to the desire to not miss anything important, 4) an overly dense grid  
137 significantly slows down the simulation making it much less efficient, and 5)  
138 what is the best way to keep track of the difference between multiple sets of  
139 shifted grids. To avoid all of these issues, the grid spacing is made very dense  
140 by setting it to half of an Angstrom, which requires no grid shifting. Because  
141 every fragment is significantly larger than half of an Angstrom, an algorithm is  
142 needed to determine where a set of connected free grid points of sufficient  
143 volume is located in order to find viable cavities for attempted particle insertion.  
144 This is done for every fragment, since different fragments have different sizes.

145

146 All of these considerations require maintaining, and updating a large  
147 bookkeeping operation during a GCMC simulation. Since GCMC is run at  
148 one fixed chemical potential while SACP is a sequence of chemical potentials,  
149 SACP with cavity bias requires following the grids through a whole multiplicity  
150 of such simulations.

151

152 Intrinsic to the SACP process is a clear method for replacing cavity-bias with a  
153 simple learning algorithm. GCMC simulations at high chemical potentials  
154 overcome energy barriers and there is a dramatically enhanced probability of

155 accepting an inserted trial fragment at these high chemical potentials except if  
156 the attempted insertion directly overlaps with a protein atom. Fragment  
157 overlap with a protein atom can be readily and quickly detected by doing a  
158 vectorized Lennard-Jones calculation with SIMD vector instructions on  
159 4-vectors available in the Intel architecture. This allows for detecting 4  
160 different potential atom overlaps simultaneously. When any atom of a trial  
161 inserted fragment overlaps a protein atom an overflow results in an IEEE NAN  
162 (not a number). This fragment is immediately rejected and a new trial  
163 insertion or deletion is attempted. Within 500,000 trial steps at very high  
164 chemical potentials the simulation cell is completely stuffed with fragments in  
165 all three solvent layers and in every possible cavity of the protein. We  
166 continue to run the simulation at this highest chemical potential until the  
167 particle number changes by <1% for 200,000 steps. Just to be clear, the  
168 particles are randomly inserted and deleted with equal probability anywhere  
169 within the simulation cell. The fast rejection when atom overlap occurs and  
170 the initial very high chemical potential results in fragments being inserted in  
171 every protein cavity capable of accommodating a fragment and with a  
172 completely filled bulk.

173

174 When the chemical potential is lowered (this is the annealing phase) new trial  
175 inserts and deletes actually produce little to no change in the system. This is  
176 because the large multi-body network of interactions between the densely



---

177 packed solvent particles is extremely stable and resistant to a fragment  
178 deletion, which would result in small evacuated areas. Insertions are not  
179 possible, because every part of the simulation cell is packed with fragments.  
180 There is only a significant change in the system when the chemical potential is  
181 lowered to a free energy value that is capable of destroying the large  
182 connected network of solvent-solvent-solvent multibody interactions. For  
183 different fragments the position of the phase transition will be different so we  
184 initially run an SACP simulation lowering the chemical potential in a very  
185 coarse manner to approximately locate the phase transition region. The  
186 coarse chemical potential schedule that we typically use is: 100, 50, 20, 10, 5,  
187 2, 0, -2, -5, -10, -20, -50, and -100. Simulations can be run by setting a fixed  
188 number of trial configurations, such as 5,000,000. To avoid an arbitrary  
189 choice, we simply monitor the average number of particles at a given chemical  
190 potential and when this particle number changes by <1% for 200,000 trials, the  
191 simulation is deemed to have reached equilibrium and it goes to the next lower  
192 chemical potential with the process repeated. When the particle number  
193 changes by greater than 40% between 2 different chemical potentials, the  
194 phase transition has been located and this preliminary phase is automatically  
195 ended.

196

197 The real simulation starts with a check point file at a high enough chemical  
198 potential that is just before the phase transition. The annealing schedule is

---

199 set to decrease the chemical potential by a single digit. For example, if the  
200 phase transition occurs between -5 and -10, the simulation is restarted with a  
201 chemical potential of -5 using the final configuration from the check point file  
202 and the annealing schedule is -6, -7,-8,-9 ...etc. Just to be clear, since -5 is  
203 before the phase transition the simulation box is completely stuffed with  
204 fragments including every possible internal protein cavity capable of binding a  
205 fragment. As the simulation proceeds with lowering the chemical potential,  
206 deletion attempts becomes more probable and occur more often. Every time  
207 a fragment is deleted that is anywhere in the vicinity of the protein including  
208 any internal cavities, its coordinates are recorded in a table. This provides a  
209 detailed and easy record of all the cavities in the protein capable of binding a  
210 fragment with no superfluous cavities, no need for grids, and thus no need for  
211 grid shifting. When the simulation reaches a chemical potential where the  
212 number of total particles in the simulation cell has dropped significantly, this  
213 indicates that much of the bulk particles have been deleted. This means that  
214 trial insertions into the bulk will almost completely fail, because it is attempting  
215 to insert a particle into a vacuum at a relatively low chemical potential. This is  
216 when surface insertion bias is turned on.

217

218 Specifically, as the annealing process continues, surface insertion bias is  
219 turned-on when one of two criteria is met whose purpose is to detect that the  
220 simulation is in a surface-only mode (no fragments in the bulk):

- 221 1. The average over all fragments of the minimum distance between the  
222 center of mass of the fragment and the center of mass of the nearest  
223 protein residue is less than the sum of the fragment radius and the  
224 average of all the protein residue radii. The radius in this case is  
225 defined as the distance of the atom furthest from the center of mass,  
226 plus its van der Waals radius. And the number of fragments remaining  
227 in the system is less than the number of protein residues (so the  
228 criterion scales with protein size). Note that this criterion takes  
229 advantage of the fact that fragments and residues are not spherical and  
230 have an aspect ratio more than 1 so that fragments must be tightly  
231 bound to the protein to achieve the criterion. This is questionable for  
232 small fragments like ammonia, methane, or water. In those cases the  
233 second criterion kicks in.
- 234 2. The number of fragments remaining in the system is less than a fixed  
235 number (typically, 100). This criterion works fine and has the  
236 advantage of being very simple.

237

238 When surface insertion bias is active, each time a fragment is deleted its  
239 coordinates are added to a list. This algorithm is extremely simple and  
240 exceptionally accurate – a location in the protein is retained on a list of cavities  
241 only if a fragment has been successfully deleted from this position, thus there  
242 are no spurious cavities sampled during this phase of the simulation. This list

---

243 serves as location bias sites for subsequent insertions. At the beginning of  
244 each new lower chemical potential, sites that have less than 50% occupancy  
245 during the previous higher chemical potential sampling period are removed  
246 from further consideration. A biased sampling technique requires detailed  
247 balance corrections to maintain microscopic reversibility. At any particular  
248 point in the simulation some of the cavities in the list are occupied by a  
249 fragment and some are free. As mentioned above, when we are in the first  
250 phase of the annealing schedule with random insertions and deletions, thus  
251 requiring no detailed balance corrections, the GCMC probability density  
252 function as formulated by Adams is used for the accept-reject criteria. In the  
253 surface insertion bias phase the detailed balance correction for attempted  
254 insertions is  $N_{\text{FREE}}/(N_{\text{OCCUPIED}}+1)$  and for deletions is  
255  $N_{\text{OCCUPIED}}/(N_{\text{FREE}}-1)$ . Two additional points should be noted, 1) when an  
256 insertion is attempted, the fragment is randomly rotated and translated by  
257 some small amount before the attempted insertion, 2) a quarter of the trial  
258 steps are canonical Monte Carlo – fragments in the simulation cell are chosen  
259 at random and randomly translated and rotated by small amounts, which is  
260 accepted or rejected with a Boltzmann probability density function.

261

262 Our compute facility is a 60-core cluster with Intel E5640 Xeon (Nehalem)  
263 2.67GHz processors. Each fragment simulation normally runs on a single  
264 core, although there is an option to run a single simulation with up to 12 cores

---

265 using OpenMP. The simulations on elastase (1ELA) ran from 45 hours for  
266 water runs (the slowest) to 15 hours for propane (fastest). For a typical  
267 clustering set of 20 fragments and waters, approximately 450 core-hours were  
268 required. In 2017, on Amazon Web Services with C4 (Skylake) instances,  
269 plus further optimization of the simulation code, this has come down to about  
270 125 core-hours (at a cost of roughly \$0.01/core/hour for spot instance pricing).  
271 The scaling is highly dependent on protein size. When a binding site is  
272 known, a protein subset can be run with location biased sampling to minimize  
273 run time to numbers similar to elastase. When searching for all hot-spot  
274 binding spots on a large protein complex, the run time can be 5-10 times larger.  
275 On AWS we typically can access 1,000 cpu's with 36 cores per cpu, so the  
276 hot-spot computations are inexpensive (\$10-\$20) and can be generally done in  
277 1-3 days.

278

## 279 **Details of the Force Fields**

280

281 The force field parameters used for the protein[7] were Amber94. The  
282 fragment van der Waals parameters were from Gaff[8] data. The partial  
283 charges for the fragments were generated using Firefly[9] 8.01 using a 6-31G\*  
284 basis with DFT B3LYP to generate quantum mechanical electron distributions  
285 that were then used to generate partial charges with RESP[10] fitting. The  
286 water parameters used in this study were developed in the Jorgensen[11] lab.

---

287 TIP3 parameters were used for the water-protein interactions and TIP4  
288 parameters were used for the water–water interactions.

289

## 290 **Details of the Thermodynamic Cycle**

291

292 The process of fragment binding to a protein can be broken down into the, 1)  
293 free energy of desolvating the part of the fragment that interacts with the  
294 protein, 2) the free energy of desolvating the sub-pocket of the protein binding  
295 site that interacts with the part of the fragment that actually binds, and 3) the  
296 free energy of this fragment-protein interaction (illustrated in S1 Fig). The  
297 present study did not need to include fragment desolvation, which can be  
298 explained by briefly summarizing one of our recent studies that did include the  
299 fragment solvation energy.

300 **Figure S1.** An illustration of the thermodynamics of ligand-protein binding.  
301 The protein binding site must be dehydrated with a  $DG(P-H_2O)$  as shown in  
302 the top line in order to bind a ligand. The ligand must be dehydrated with a  
303  $DG(L-H_2O)$  as shown in the bottom line in order to interact with the protein.  
304 These two lines converge in the middle with the ligand coming together with  
305 the protein  $DG(P-L)$ . Fragment binding and protein hydration-dehydration are  
306 rigorously computed with Simulated Annealing of Chemical Potential (SACP).  
307 Ligand dehydration was neglected for the reasons described in the text.

308

---

309 The SAMPL3 challenge of 2012 was a contest designed to evaluate the  
310 predictive abilities of fragment-based methods. The scientists running the  
311 contest picked a protein and performed X-ray analysis with fragment soaking  
312 experiments to explicitly determine all of the positions on the protein where  
313 fragment binding occurs and also conducted binding experiments to obtain the  
314 interaction free energy between the fragments and the protein. This  
315 information was kept confidential. The PDB file of the protein and the list of  
316 fragments were made available to the research community. The challenge  
317 was to submit detailed predictions of fragment binding locations and binding  
318 free energies by a deadline and the experimental data were subsequently  
319 released so that the results could be objectively judged. SACP was used to  
320 predict fragment-protein binding and water-protein binding. Clustering high  
321 affinity fragments with water exclusion readily identified the binding site. The  
322 rank order binding free energy based on the chemical potential – fragments  
323 that still remain bound as the chemical potential was lowered are predicted to  
324 have higher affinity than fragments vacating the binding site at that same  
325 chemical potential – very accurately tracked a large majority of the  
326 experimental data.

327

328 The predictions were made even more accurate when we included a  
329 continuum solvent model for the ligand dehydration. As would be expected,  
330 this was especially true when comparing fragments that are chemically and

---

331 physically very different, because the solvation free energies are very different.  
332 The continuum solvent model used in this SAMPL3 study was developed[12]  
333 in our group. While there are many models that accurately predict small  
334 molecule free energies of solvation, many of which are cited in this paper from  
335 our group, we created a new model that is of high accuracy, but is also fast  
336 enough to be incorporated into the simulations. Just to be clear, running the  
337 full annealing schedules can require performing over 100,000,000 Monte Carlo  
338 trial steps, so incorporating a continuum model for ligand solvation-desolvation  
339 free energy must be very fast. Complete details of applying SACP to the  
340 SAMPL3 challenge[13] have been published.

341

342 It was not necessary to use the continuum model in the studies presented in  
343 this paper, because the 3 molecules designed to inhibit peptide deformylase  
344 are all congeners of the same core structure and thus would have virtually  
345 identical solvation free energies. Incorporating the continuum calculation  
346 would not have altered the rank-order binding predictions, so there was no  
347 need to introduce this added calculation. For the RecA studies, the SACP  
348 simulations led to the clear prediction of one molecule, 6-hydroxydopamine,  
349 which we purchased and had tested. The 6-HD will obviously be completely  
350 and strongly water solvated, because of the positively charged amine group  
351 and the 3 hydroxyl groups. Additionally, because no comparative analysis  
352 between different fragments was required, there was no need to employ the



353 solvation free energy calculation for 6-HD. The SACP prediction was so  
354 compelling because the fragment pattern produced 6-HD interacting with RecA  
355 in a manner that mimicked 2 universally conserved amino acids, so it was  
356 worth just testing it experimentally. Finally, for all of the other test cases,  
357 SACP predictions of fragment-protein and water-protein binding with clustering  
358 and water exclusion (which accounts for fragment-water competition for  
359 binding to a location on the protein) reproduced all of the known experimental  
360 data cited in this study.

361

362

363

## Fragment set for clustering and methodology

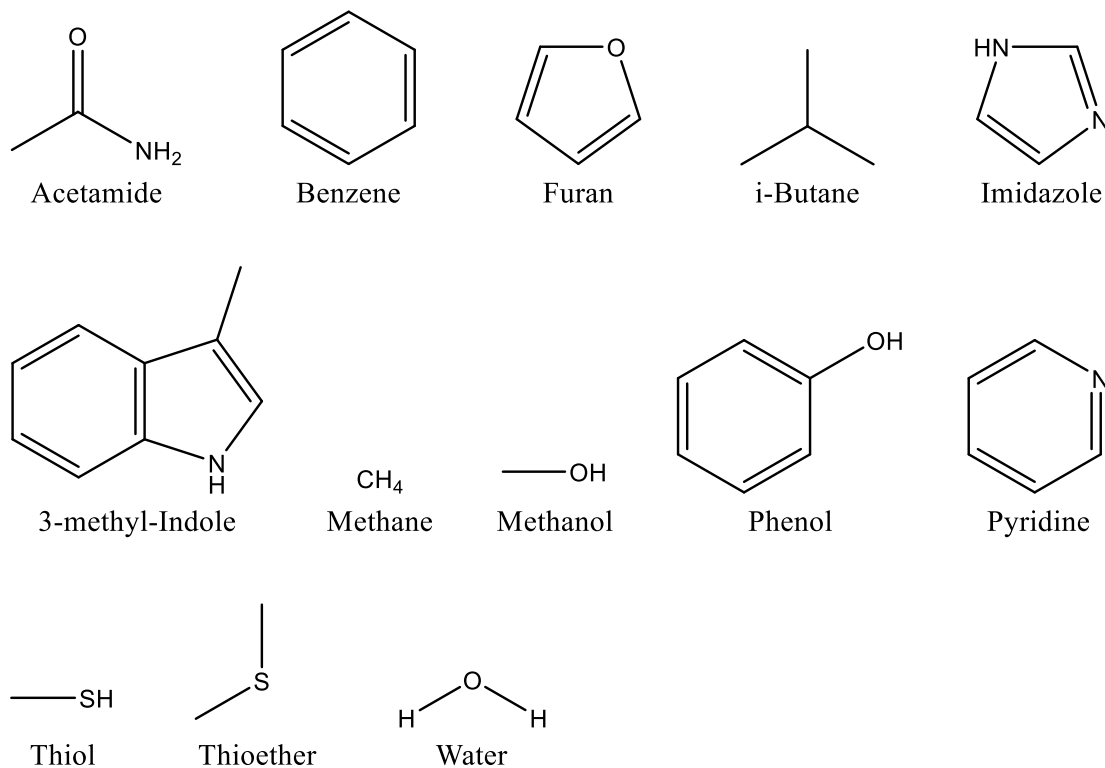

364

365

366 **Figure S2.** The basis fragment set used to probe the various targets described

367 in the manuscript. This is similar to the dataset in our previous publication.[14]

368

369 Successful computational hot-spot mapping using are algorithm is based on

370 three principles. First, the chemical fragments need to have highly favorable

371 interaction energies with the protein. If the energies are too favorable, there

372 will be one or no fragment binding sites. On the other hand, if the energies are

373 marginally favorable, say at the phase transaction, then the entire protein

374 surface will be covered with fragments. Thus, we take energetic values

375 approximately halfway between the phase transition and the value at which

376 only one fragment appears on the surface. Our second principle is to exclude  
377 sites where tightly bound water molecules could potentially block fragment  
378 binding. Our SACP approach gives quantitative values for each water  
379 molecule on the protein surface. We categorize these into three bins (i) bulk  
380 water like and easy to displace, (ii) bound but only a small energy to displace,  
381 and (iii) tightly bound and high energetic cost to replace. During our clustering  
382 algorithm, the waters in category iii are kept in place and exclude hot-spot  
383 identification in those sites. Lastly, we look for sites where a diverse set of  
384 chemical fragments bind.

385

386 **References**

387

- 388 1. Rajagopalan PT, Datta A, Pei D. Purification, characterization, and inhibition of peptide  
389 deformylase from *Escherichia coli*. *Biochemistry*. 1997;36(45):13910-8. PubMed PMID: 9374870.
- 390 2. Rajagopalan PT, Pei D. Oxygen-mediated inactivation of peptide deformylase. *J Biol Chem*.  
391 1998;273(35):22305-10. PubMed PMID: 9712848.
- 392 3. Xian-bing T, Shu -y S, Yue-qin Z. Establishment of a high throughput screening model targeted  
393 on peptide deformylase (PDF) of *E. coli*. *Chinese Journal of Antibiotics*. 2003;28:621-6.
- 394 4. Clements JM, Beckett RP, Brown A, Catlin G, Lobell M, Palan S, et al. Antibiotic activity and  
395 characterization of BB-3497, a novel peptide deformylase inhibitor. *Antimicrob Agents Chemother*.  
396 2001;45(2):563-70. PubMed PMID: 11158755.
- 397 5. Adams DJ. Grand canonical ensemble Monte Carlo for a Lennard-Jones fluid. *Mol Phys*  
398 1975;29(1):307-11.
- 399 6. Mezei M. Grand-canonical ensemble Monte Carlo study of dense liquid Lennard-Jones, soft  
400 spheres and water. *Mol Phys*. 1987;61:565-82.
- 401 7. Cornell WD, Cieplak P, Bayly CI, Gould IR, Merz KM, Ferguson DM, et al. A Second Generation  
402 Force Field for the Simulation of Proteins, Nucleic Acids, and Organic Molecules. *Journal of the*  
403 *American Chemical Society*. 1995;117(19):5179-97.
- 404 8. Wang J, Wolf RM, Caldwell JW, Kollman PA, Case DA. Development and testing of a general  
405 amber force field. *J Comput Chem*. 2004;25(9):1157-74. PubMed PMID: 15116359.
- 406 9. Schmidt MW, Baldridge KK, Boatz JA, Elbert ST, Gordon MS, Jensen JH, et al. General Atomic  
407 and Molecular Electronic Structure System *J Comput Chem*. 1993;14(11):1347-63.
- 408 10. Steinbrecher T, Latzer J, Case DA. Revised AMBER parameters for bioorganic phosphates. *J*  
409 *Chem Theory Comput*. 2012;8(11):4405-12. PubMed PMID: 23264757.
- 410 11. Jorgensen WL, Chandrasekhar J, Madura JD, Impey RW, Klein ML. Comparison of simple  
411 potential functions for simulating liquid water. *The Journal of Chemical Physics*. 1983;79(2):926-35.
- 412 12. Boyer RD, Bryan RL. Fast estimation of solvation free energies for diverse chemical species. *J*  
413 *Phys Chem B*. 2012;116(12):3772-9. PubMed PMID: 22339050.
- 414 13. Kulp JL, 3rd, Blumenthal SN, Wang Q, Bryan RL, Guarnieri F. A fragment-based approach to the  
415 SAMPL3 Challenge. *J Comput Aided Mol Des*. 2012;26(5):583-94. PubMed PMID: 22290624.
- 416 14. Kulp JL, 3rd, Kulp JL, Jr., Pompliano DL, Guarnieri F. Diverse fragment clustering and water  
417 exclusion identify protein hot spots. *J Am Chem Soc*. 2011;133(28):10740-3. PubMed PMID:  
418 21682273.

419
